# Supplementary material for: Developmental regulation of CB1-mediated spike-time dependent depression at immature mossy fiber-CA3 synapses
Source: PubMed Central journal article supplement — Sci Rep. 2012 Feb 24;2:285. doi: 10.1038/srep00285 (PMC3285903; doi:10.1038/srep00285), 2012-02-24
Supplement: srep00285-s1.pdf [file srep00285-s1.pdf]

## Supplementary Information

### Developmental regulation of CB1-mediated spike-time dependent depression at immature mossy fiber-CA3 synapses

Maddalena D. Caiati<sup>1</sup>, Sudhir Sivakumaran<sup>1,4</sup>, Frederic Lanore<sup>2</sup>, Christophe Mulle<sup>2</sup>, Elodie Richard<sup>3</sup>, Dany Verrier<sup>3</sup>, Giovanni Marsicano<sup>3</sup>, Richard Miles<sup>4</sup> & Enrico Cherubini<sup>1\*</sup>

<sup>1</sup>Neurobiology Dept. and Italian Institute of Technology Unit, International School for Advanced Studies, Trieste, Italy; <sup>2</sup>Interdisciplinary Institute for Neuroscience, CNRS UMR 5297, Bordeaux, France; <sup>3</sup>INSERM U862, Bordeaux, France; <sup>4</sup>INSERM UMRS975, Paris, France.

\***Corresponding Author:** Enrico Cherubini, Neurobiology Sector, International School of Advanced Studies (SISSA), via Bonomea 265, 34136 Trieste, Italy. Tel: +39-040-3787704; Fax: +39-040-3787702; e-mail: [cher@sissa.it](mailto:cher@sissa.it)

**Figure S1**

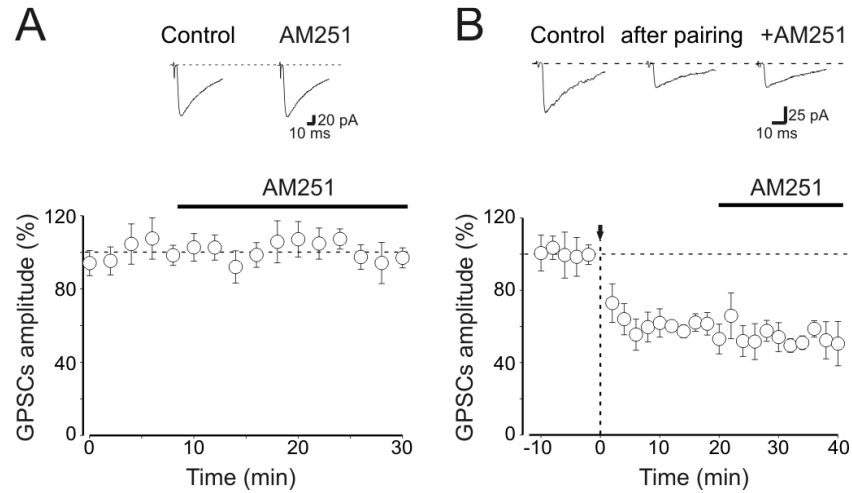

**Figure S1.** The CB1 receptor antagonist AM251 *per se* does not affect MF-GPSCs. A. The mean amplitude of GPSCs evoked by stimulation of granule cells in the dentate gyrus before and during bath application (bar) of 5  $\mu$ M AM251 is plotted against time (n=8). The traces above the graph represent synaptic responses obtained in control and during AM251. B. As in A, but AM251 was applied ~10 min after pairing (arrow at time 0; n=10).

**Figure S2**

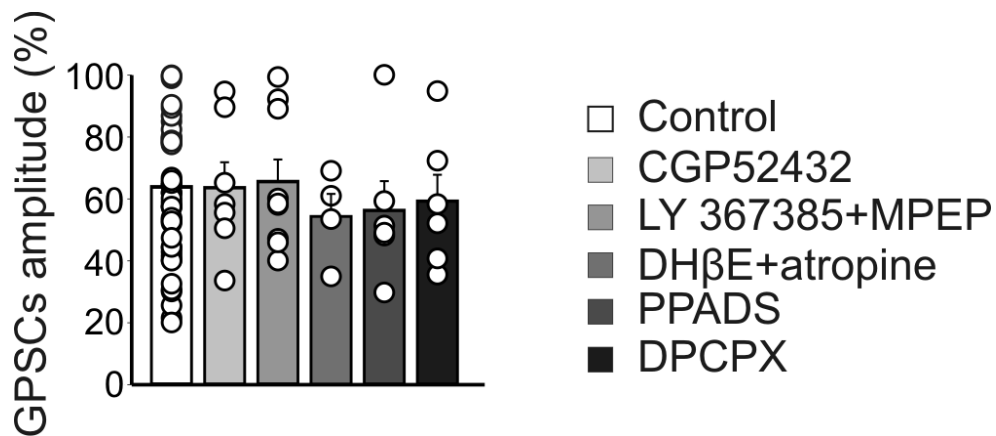

**Figure S2.** At immature MF-CA3 synapses, STD-LTD is not mediated by type I mGluR or by the indirect action of other receptors known to depress transmitter release. Each column represents the mean amplitude of MF-GPSCs measured 20 min after pairing in the absence (Control) or in the presence of selective antagonists for GABA<sub>B</sub> receptors (CGP 52432, 3 μM; n=7), for type mGluR1 and mGluR5 (LY367385, 100 μM plus MPEP, 5μM; n=9), for muscarinic and nicotinic receptors (atropine 1 μM plus DHβE 50 μM; n=4), for purinergic P2Y (PPADS 50 μM; n=6) and for adenosine receptors (DPCPX, 10 μM; n=6). The mean amplitude of GPSCs obtained in different experimental groups was significantly different from that measured before pairing ( $p<0.01$ ).

**Figure S3**

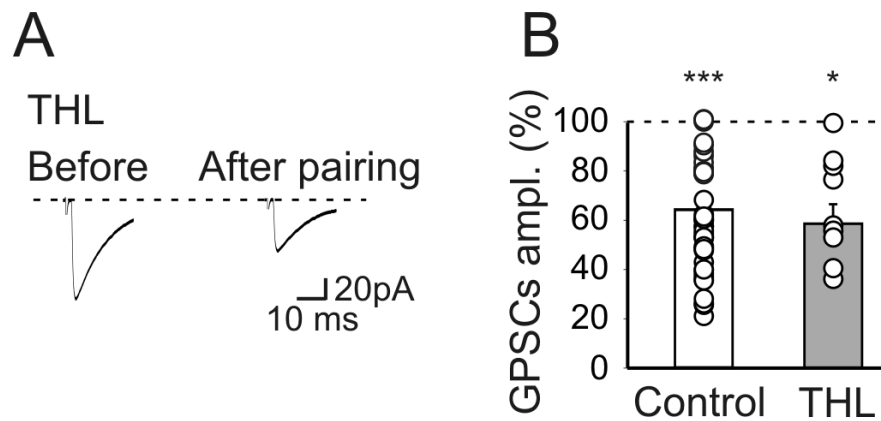

**Figure S3.** 2-AG is not involved in CB1-dependent STD-LTD. A. MF-GPSC recorded with a patch pipette containing THL. B. Pairing-induced changes in GPSCs amplitude in cells loaded (n=9, grey column) or not (n=44, white column) with THL. \*  $p<0.05$ ; \*\*\* $p<0.001$ .

**Figure S4**

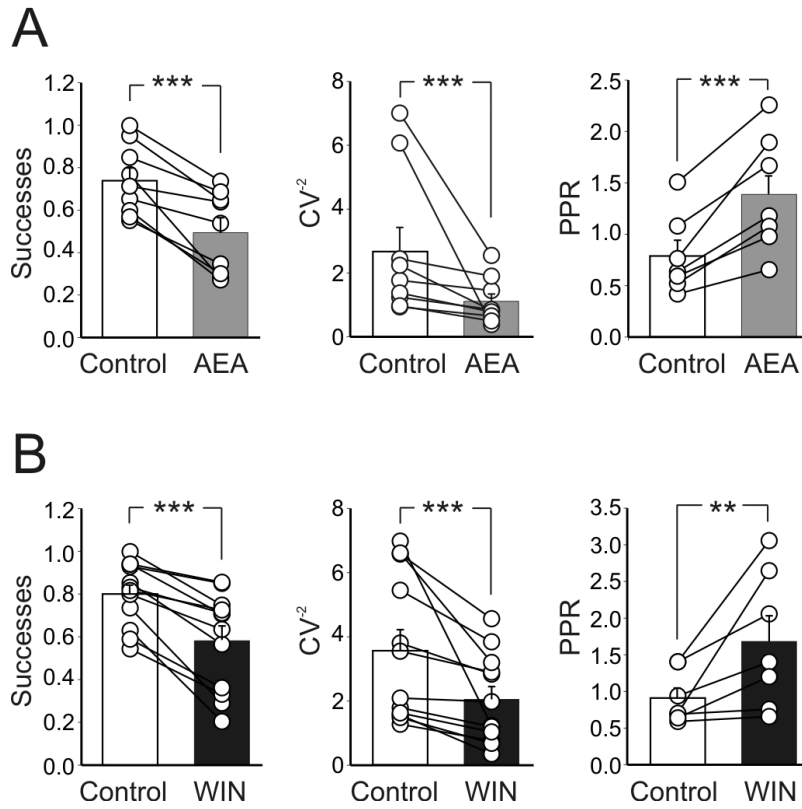

**Figure S4.** AEA and WIN act at presynaptic sites. A. Successes (n=9), CV<sup>2</sup> (n=9) and PPR (n=7) values obtained before (Control, white columns) and after bath application of anandamide (AEA; 30  $\mu$ M, grey columns). B. Successes (n=12), CV<sup>2</sup> (n=12) and PPR (n=7) values obtained before (Control, white columns) and after bath application of the selective CB1 receptor agonist WIN 55,212-2 (WIN; 2  $\mu$ M, black columns). \*\*  $p < 0.01$ ; \*\*\*  $p < 0.001$ .
